# Supplementary material
Source: publisher figshare collection journal article supplement (https://gsajournals.figshare.com/articles/dataset/_/11729019)
Supplement: Supplementary file 1 [file 1]

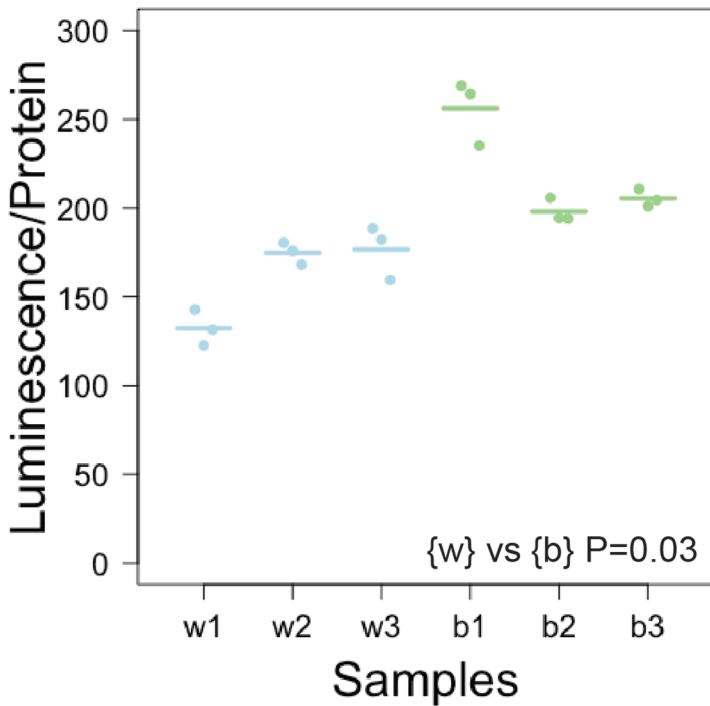

**Figure S2. Comparison of luciferase ATP assay luminescence normalized to protein in *br<sup>5</sup>* and *w<sup>1118</sup>* leg and wing imaginal discs.** Leg and wing imaginal discs were pooled into three biological replicates for both wild type and mutant lines and ATP levels were assessed using a luciferase-based assay and normalized to protein levels for each sample. Lines represent average values from three technical replicates (shown as dots) from each sample. We performed a type 3 ANOVA with protein level and treatment as factors. ATP levels were significantly different both when comparing across treatment (*w<sup>1118</sup>* vs. *br<sup>5</sup>*;  $P=0.03$ ) and when comparing between samples based on protein level ( $P=0.0000496$ ).
