# Supplementary material
Source: publisher figshare collection journal article supplement (https://gsajournals.figshare.com/articles/dataset/_/11729019)
Supplement: Supplementary file 3 [file 1]

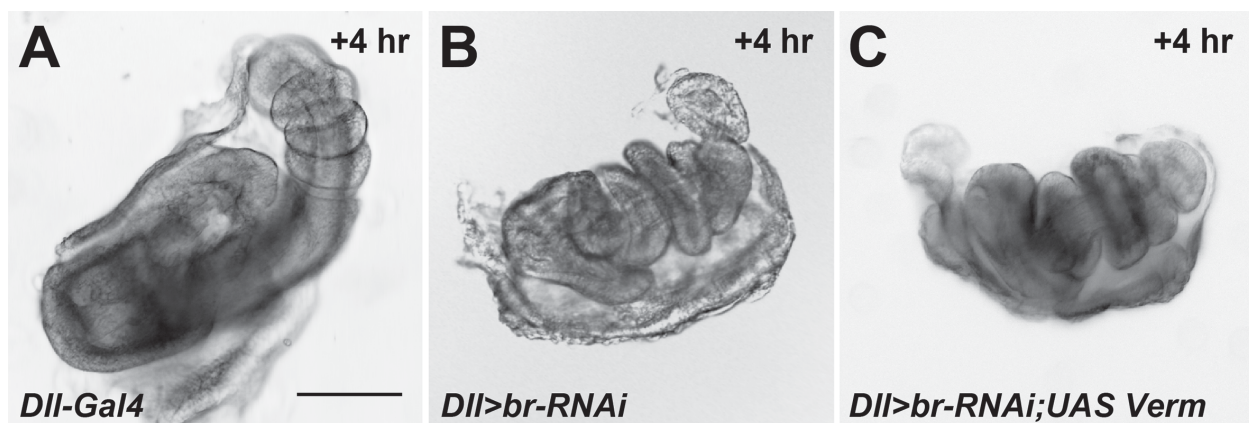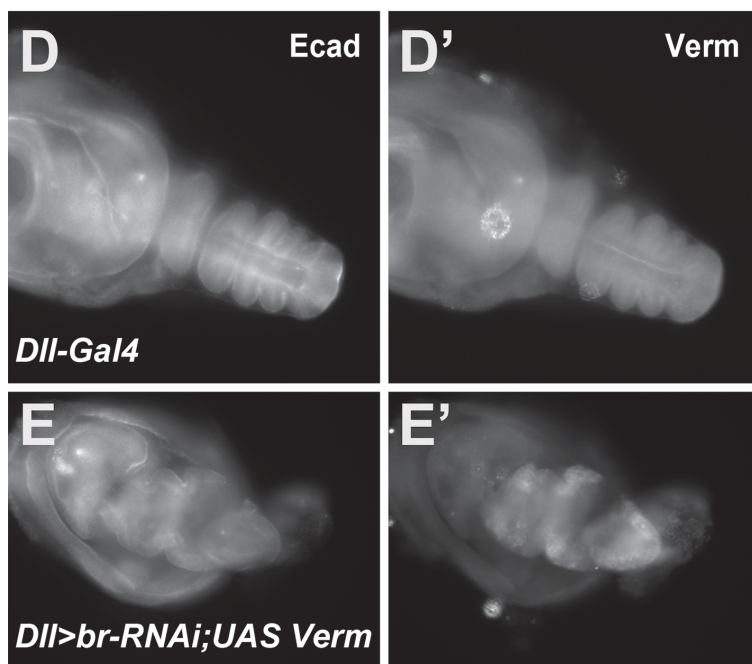

**Figure S3. Overexpression of Verm does not rescue *br-RNAi* leg defects.** (A-C) Brightfield photomicrographs of leg imaginal discs from +4 hr *Dll-Gal4* (A), *Dll>br-RNAi* (B) and *Dll>br-RNAi; UAS-Verm* (C) prepupae. Whereas the leg discs from *Dll-Gal4* have elongated (this disc has fully elongated but is curved towards the back), the leg discs from both the *Dll>br-RNAi* and *Dll>br-RNAi; UAS-Verm* show limited elongation and the deeper segmental folds found in *br<sup>5</sup>* mutant animals (see Figure 1J for comparison). (D and E) Wide field fluorescence photomicrographs of leg imaginal discs from +4 hr *Dll-Gal4* (D) and *Dll>br-RNAi; UAS-Verm* (E) animals stained with antibodies against E-Cadherin (D and E) and Verm (D' and E'). Note the lack of elongation in the *Dll>br-RNAi; UAS-Verm* legs and that they are overexpressing Verm in the distal segments. Scale bar equals 100  $\mu$ m.
